# Supplementary material
Source: PubMed Central journal article supplement (PMC6851618)
Supplement: 2019.04.03_Appendix_1_Knowledge_Questionnaire.pdf [file 2019.04.03_Appendix_1_Knowledge_Questionnaire.pdf]

## After Knowledge Questionnaire

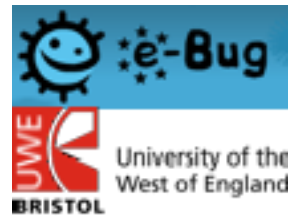

Name:  
Age:  
Gender:

Please answer the following true/false questions

|                                                                                 | True                     | False                    |
|---------------------------------------------------------------------------------|--------------------------|--------------------------|
| 1) Antibiotics can cure the common cold.                                        | <input type="checkbox"/> | <input type="checkbox"/> |
| 2) Antibiotics don't harm 'good' bacteria.                                      | <input type="checkbox"/> | <input type="checkbox"/> |
| 3) There are more 'bad' microbes than 'good'.                                   | <input type="checkbox"/> | <input type="checkbox"/> |
| 4) Only certain types of bacteria can become resistant.                         | <input type="checkbox"/> | <input type="checkbox"/> |
| 5) Farm animals use the most antibiotics.                                       | <input type="checkbox"/> | <input type="checkbox"/> |
| 6) Antibiotics can be used as painkillers.                                      | <input type="checkbox"/> | <input type="checkbox"/> |
| 7) New antibiotics can be easily created.                                       | <input type="checkbox"/> | <input type="checkbox"/> |
| 8) You can only pass on antibiotic resistant bacteria if you have an infection. | <input type="checkbox"/> | <input type="checkbox"/> |
| 9) The more we use antibiotics, the more antibiotic resistant microbes appear.  | <input type="checkbox"/> | <input type="checkbox"/> |
| 11) People can carry antibiotic resistant bacteria without symptoms.            | <input type="checkbox"/> | <input type="checkbox"/> |
| 12) People can't die from an antibiotic resistant infection.                    | <input type="checkbox"/> | <input type="checkbox"/> |
| 13) Most antibiotics are prescribed by GPs outside of hospitals.                | <input type="checkbox"/> | <input type="checkbox"/> |
| 14) Microbes can only be resistant to one type of antibiotics                   | <input type="checkbox"/> | <input type="checkbox"/> |

Please circle the correct answer for the following questions.

15) Antibiotics can kill...

Bacteria only

Viruses only

Both

16) How should you take antibiotics?

Until you feel better

For the full length of the course

Make sure to save some for next time

17) Who becomes resistant due to overuse of antibiotics?

People

Animals

Bacteria

Viruses

18) What are antibiotics?

19) Do you know what a backup prescription is?

Yes  No

If you know, please use the box below to answer what they are.

## Session Feedback

Out of 10, how much did you enjoy this session? 1 being hated and 10 being loved.

1      2      3      4      5      6      7      8      9      10

Out of 10, where 1 is extremely unimportant and 10 is extremely important, how important do you think about the following statements ?

1) How important to you is antibiotic resistance?

2) People should think about antibiotic resistance when they ask a GP for antibiotics.

3) GP staff should use backup antibiotic prescriptions as much as possible.

What was your favourite part of the debate?

Which parts, if any, did you enjoy less?

Were there any parts of the debate that you think could be improved?

## **Data Protection Privacy Notice**

By submitting this information you are consenting for your questionnaire answers to be included.

- You will not be identified in the questionnaire reporting.
- All data will be treated as personal under the 1998 Data Protection Act and will be stored securely.
- Your data will be used for the purposes of the e-Bug debate kit evaluation study
